# Supplementary material for: Association of wild bird densities around poultry farms with the risk of highly pathogenic avian influenza virus subtype H5N8 outbreaks in the Netherlands, 2016
Source: PubMed Central journal article supplement (PMC8048466; doi:10.1111/tbed.13595), 2020-05-18
Supplement: TBED-68-76-s002.pdf [file TBED-68-76-s002.pdf]

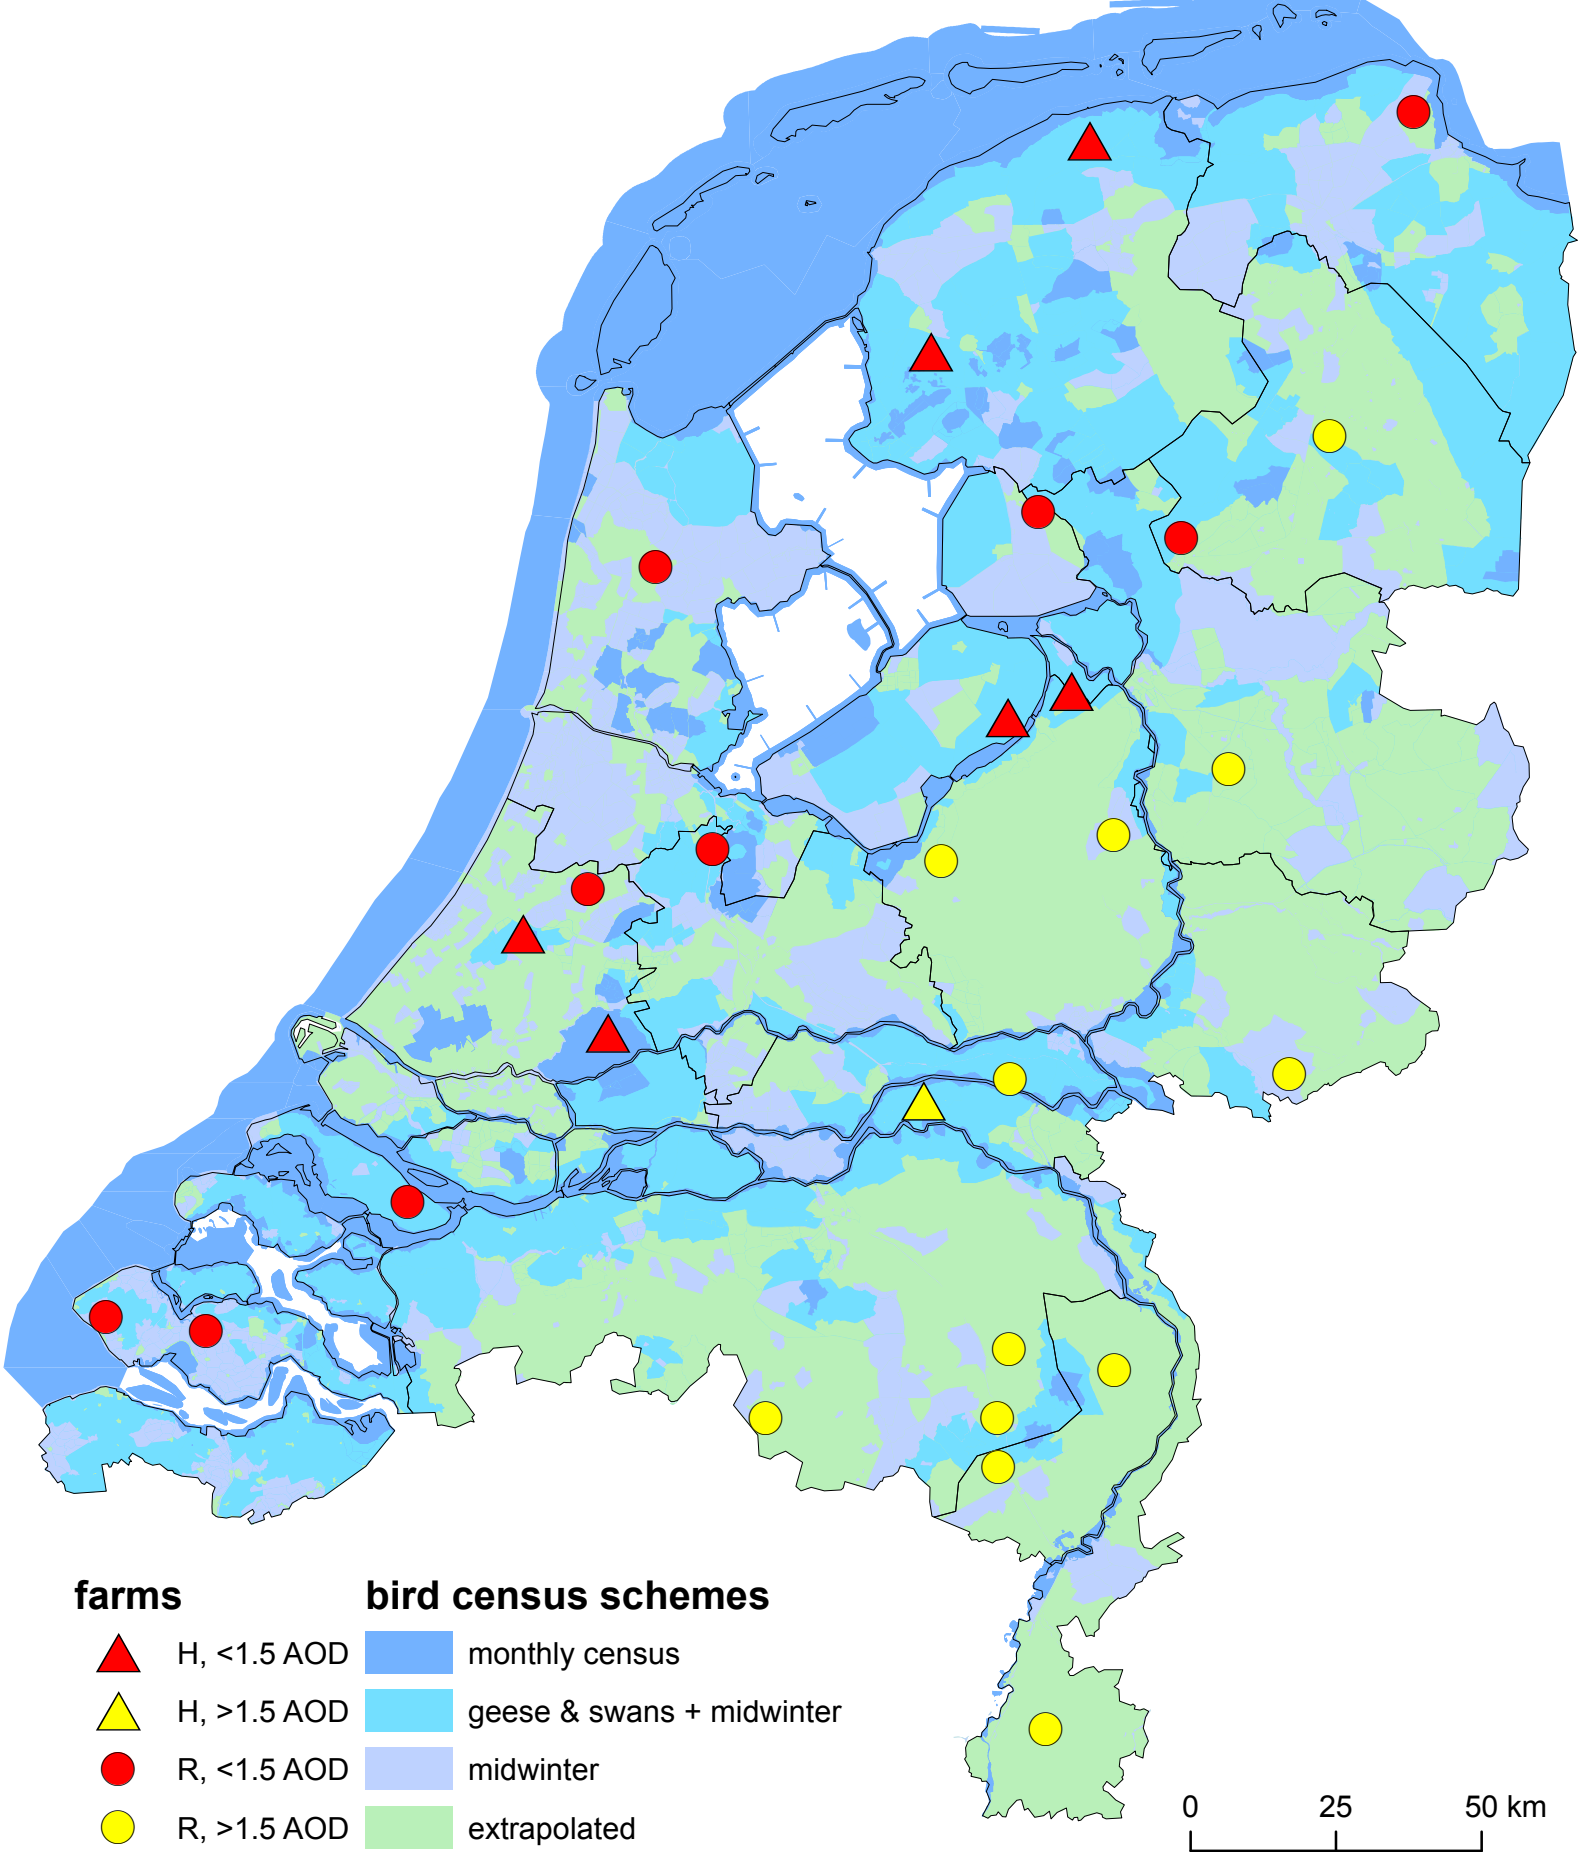

**SUPPORTING INFORMATION FIGURE S1**
